# Supplementary material
Source: MDPI journal article supplement (https://www.mdpi.com/2071-1050/10/8/2905)
Supplement: s1 [file s1]

# QUESTIONNAIRE FOR THE INTERVIEW

## Peam Popech and Phlong Community Fisheries, Kampong Chhnang Province, Cambodia

### Part 1: Characteristics of Community Fisheries

**Community Name:** \_\_\_\_\_

**1.3. Sex:**   ☐ Male        ☐ Female

**1.4. Age:**

- |                                |                             |                                    |
|--------------------------------|-----------------------------|------------------------------------|
| <input type="radio"/> Under 15 | <input type="radio"/> 36-45 | <input type="radio"/> 66-75        |
| <input type="radio"/> 15-25    | <input type="radio"/> 46-55 | <input type="radio"/> 76-85        |
| <input type="radio"/> 26-35    | <input type="radio"/> 56-65 | <input type="radio"/> 86 and above |

**1.5. What is the highest level of education that you have completed?**

- |                                           |                                         |
|-------------------------------------------|-----------------------------------------|
| <input type="radio"/> No formal education | <input type="radio"/> University Degree |
| <input type="radio"/> Secondary School    | <input type="radio"/> Graduate Degree   |
| <input type="radio"/> High School         |                                         |

**1.6. How much does fishing contribute to your monthly income during the dry season?**

|      |       |        |               |
|------|-------|--------|---------------|
| None | 0-30% | 30-70% | More than 70% |
| 1    | 2     | 3      | 4             |

**1.7. How much does fishing contribute to your monthly income during the wet season?**

|      |       |        |               |
|------|-------|--------|---------------|
| None | 0-30% | 30-70% | More than 70% |
| 1    | 2     | 3      | 4             |

**1.8 List all income generating activities, besides fishing, which you take part in during the wet season:**

- |                                    |                                       |                                           |
|------------------------------------|---------------------------------------|-------------------------------------------|
| <input type="radio"/> Rice farming | <input type="radio"/> Construction    | <input type="radio"/> Fishing gear making |
| <input type="radio"/> Crops        | <input type="radio"/> Fish trade      | <input type="radio"/> Animal husbandry    |
| <input type="radio"/> Factory      | <input type="radio"/> Fish processing | <input type="radio"/> Other: _____        |

**1.9 List all income generating activities, besides fishing, which you take part in during the dry season:**

- |                                    |                                       |                                           |
|------------------------------------|---------------------------------------|-------------------------------------------|
| <input type="radio"/> Rice farming | <input type="radio"/> Construction    | <input type="radio"/> Fishing gear making |
| <input type="radio"/> Crops        | <input type="radio"/> Fish trade      | <input type="radio"/> Animal husbandry    |
| <input type="radio"/> Factory      | <input type="radio"/> Fish processing | <input type="radio"/> Other: _____        |

**1.12. How many days a week do you eat the fish you catch during the dry season?**

|      |                         |                 |           |
|------|-------------------------|-----------------|-----------|
| None | Less than 3 days a week | 3-5 days a week | Every Day |
| 1    | 2                       | 3               | 4         |

**1.13. How many days a week do you eat the fish you catch during the wet season?**

|      |                         |                 |           |
|------|-------------------------|-----------------|-----------|
| None | Less than 3 days a week | 3-5 days a week | Every Day |
| 1    | 2                       | 3               | 4         |

**1.14. Which of the following do you own?**

- |                                                          |                                                     |
|----------------------------------------------------------|-----------------------------------------------------|
| <input type="radio"/> Rice Fields (If so _____ hectares) | <input type="radio"/> Fishing Gear (specify gear)   |
| <input type="radio"/> Crop Fields (If so _____ hectares) | <input type="radio"/> Livestock (specify livestock) |
| <input type="radio"/> Boat                               | <input type="radio"/> House                         |

## Part 2. Status of Fishery Resources and Management

**2.1.** According to your experience, compared to ten years ago, the abundance of black fish has:

|                         |                    |           |                    |                         |
|-------------------------|--------------------|-----------|--------------------|-------------------------|
| Significantly decreased | Slightly decreased | No change | Slightly increased | Significantly increased |
| 1                       | 2                  | 3         | 4                  | 5                       |

**2.2.** According to your experience, compared to ten years ago, the abundance of white fish has:

|                         |                    |           |                    |                         |
|-------------------------|--------------------|-----------|--------------------|-------------------------|
| Significantly decreased | Slightly decreased | No change | Slightly increased | Significantly increased |
| 1                       | 2                  | 3         | 4                  | 5                       |

**2.3.** According to your experience, compared to ten years ago, the average size of white fish has:

|                         |                    |           |                    |                         |
|-------------------------|--------------------|-----------|--------------------|-------------------------|
| Significantly decreased | Slightly decreased | No change | Slightly increased | Significantly increased |
| 1                       | 2                  | 3         | 4                  | 5                       |

**2.4.** According to your experience, compared to ten years ago, the average size of black fish has:

|                         |                    |           |                    |                         |
|-------------------------|--------------------|-----------|--------------------|-------------------------|
| Significantly decreased | Slightly decreased | No change | Slightly increased | Significantly increased |
| 1                       | 2                  | 3         | 4                  | 5                       |

**2.5.** List any community or social groups you are a member of:

- ☐ Community Fishery
- ☐ Savings Group
- ☐ Women's Group
- ☐ Water management community
- ☐ Others: \_\_\_\_\_

## Part 3. Financial Status

Select the answer that best describes how much you agree with the described feelings:

|                                                                                                   | Strongly Agree        | Slightly Agree        | No Opinion            | Slightly Disagree     | Strongly Disagree     |
|---------------------------------------------------------------------------------------------------|-----------------------|-----------------------|-----------------------|-----------------------|-----------------------|
| <b>3.1.</b> I am concerned about accessibility to loans.                                          | <input type="radio"/> |
| <b>3.2.</b> Loans should be available to all community members.                                   | <input type="radio"/> |
| <b>3.3</b> For the community as a whole to benefit, not everybody can have equal access to loans. | <input type="radio"/> |
| <b>3.4</b> The appropriate distribution of loans should be prioritized.                           | <input type="radio"/> |

Select the answer that best describes how much you agree with the described feelings:

|                                                              | Strongly Agree        | Slightly Agree        | No Opinion            | Slightly Disagree     | Strongly Disagree     |
|--------------------------------------------------------------|-----------------------|-----------------------|-----------------------|-----------------------|-----------------------|
| <b>3.5</b> This community has a strong savings group leader. | <input type="radio"/> |

\*\*\*\*\*
